# Supplementary material for: Neofunctionalization of zona pellucida proteins enhances freeze-prevention in the eggs of Antarctic notothenioids
Source: PubMed Central journal article supplement (PMC5059455; doi:10.1038/ncomms12987), 2016-10-04
Supplement: ncomms12987-s1.pdf [file ncomms12987-s1.pdf]

## Supplementary Information

Containing 10 supplementary figures and 4 supplementary tables

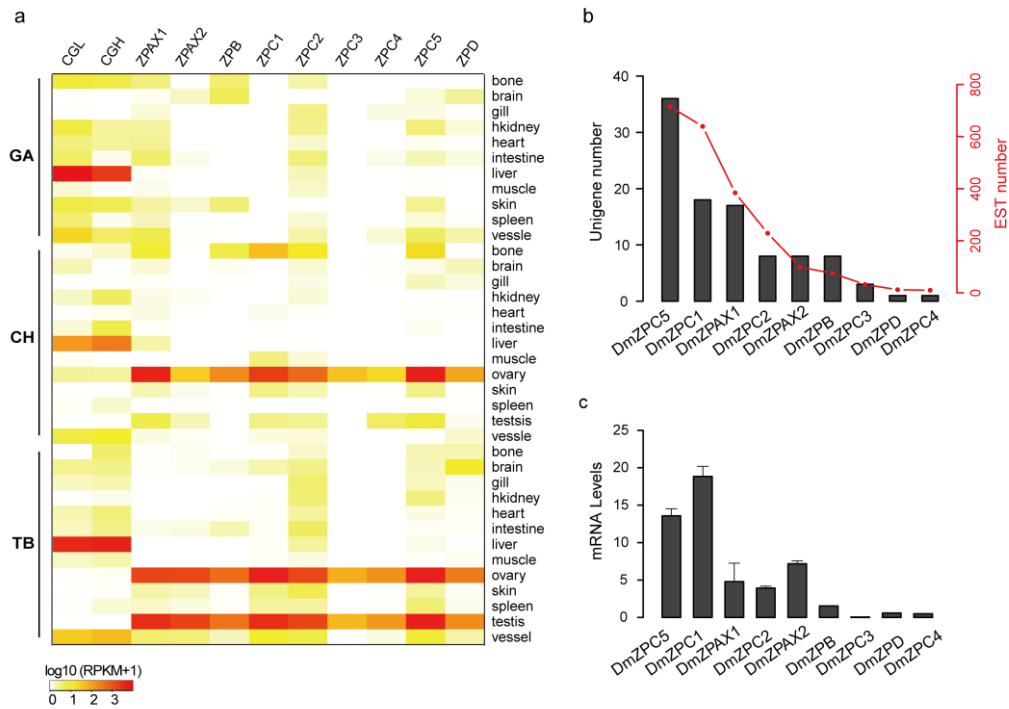

**Supplementary Figure 1. (a).** Heatmap showing the ubiquitous expression of ZP gene family members in multiple tissues in three Antarctic notothenioids (*G. acuticeps*, *C. hamatus*, and *T. bernacchii*). Gene expression levels were calculated in 11 tissues using RPKM values that were deduced using RNA-seq. The 11 ZP genes analyzed were shown on the top. The tissues examined in these species are shown to the right. The color scales represent the log 10 transformations of expression levels (RPKM). The RNA-seq data of *T. bernacchii* are deposited to the NCBI GenBank under the Accession no. SRP068525, and the head kidney for *C. hamatus* and *G. acuticeps* are deposited to NCBI Genbank under the accessions no. GSE70113 through another published paper (Xu et al., 2016). **(b).** Transcript abundance of the ZP types deduced from sequencing of *D. mawsoni* ovary and liver cDNA libraries (Chen et al., 2008). The gray bar represents the unigene numbers of each ZP type, and the dotted line represents the total number of ESTs of each type that were found in the two transcriptomes. **(c).** The expression levels of the ZP genes in *D. mawsoni* ovary tissues were detected using real-time PCR (normalized to actin, shown as mean with SD, n=3).

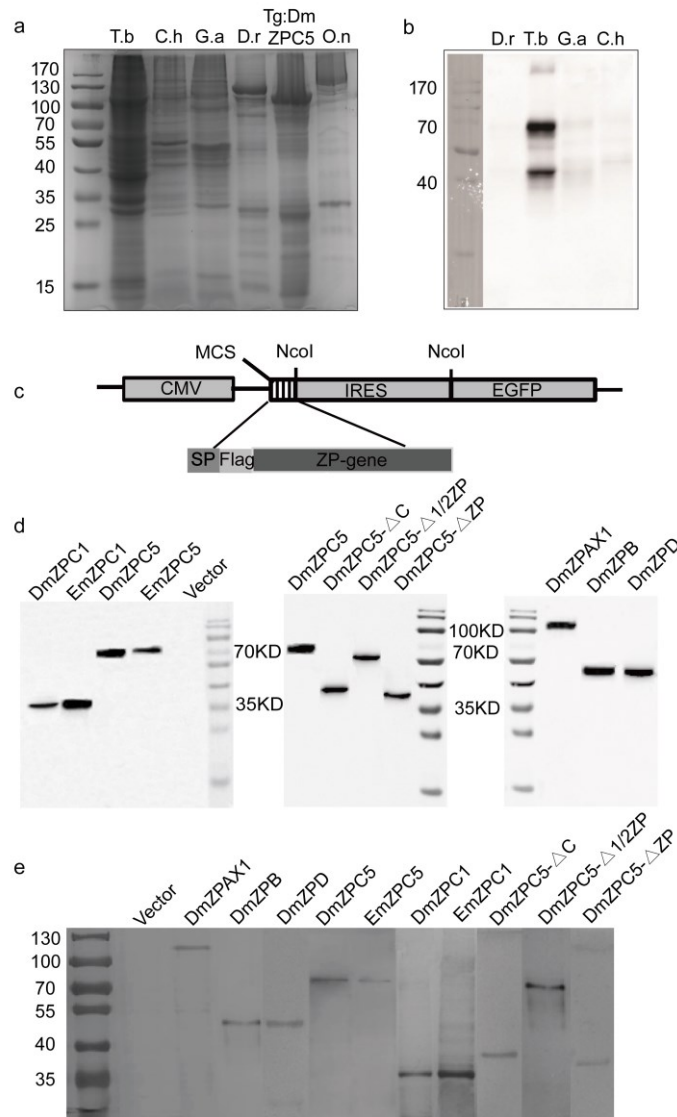

**Supplementary Figure 2. Chorion protein extractions and recombinant expression of the AnnotoZPs. (a). SDS-PAGE (denaturing) gel showing the complexity of the extracted chorion proteins obtained from *T. bernacchii*, *C. hamatus*, *G. acuticeps*, *D. rerio*, transgenic zebrafish and *O. niloticus*. Approximately 12-20  $\mu$ g of total proteins were loaded on a 10% SDS-PAGE. Silver staining was used to visualize the protein bands. The extracted chorion proteins were heterogeneous in size as a result of complex polymerization schemes between the various ZP types. This may also have resulted from the presence of non-ZP proteins in the chorion. (b). Western blot analysis of egg chorion proteins obtained from four fish species were separated by SDS-PAGE and labeled with the anti-dmZPC5 antibody. ZPC5 was identified in Antarctic fish chorions in two forms with different sizes: a C-terminal cleaved form (a 45 kD band) and an uncleaved preproprotein (a 75 kD band). The 75 kD isoform indicates that a large**

percentage of ZPC5 is not processed *in vivo*. A fraction of ZPC5 remained in a polymerized state (shown as a band that was bigger than 170 kD) as a result of incomplete dissociation under electrophoretic conditions. The anti-DmZPC5 antibody interacted poorly with the zebrafish ZPs (lane D.r). **(c). The vector and the cloning scheme used for recombinant expression of AnnotoZPs.** **(d).** Western blot analysis was performed using an anti-FLAG antibody to probe the product of the recombinant AnnotoZPs. A total of 50 µg of crude protein was extracted from the transfected CHO cells and loaded for 10% SDS-PAGE. The ‘vector’ lane contains the protein that was extracted from the cells that were transfected with the empty vector, and the other lanes are labeled to indicate each of the recombinant ZP types that were expressed. **(e). Examination of the quality and the quantity of the affinity chromatography-purified recombinant proteins.** Approximately 5 µg of each protein was loaded onto SDS-PAGE gels and visualized using silver staining.

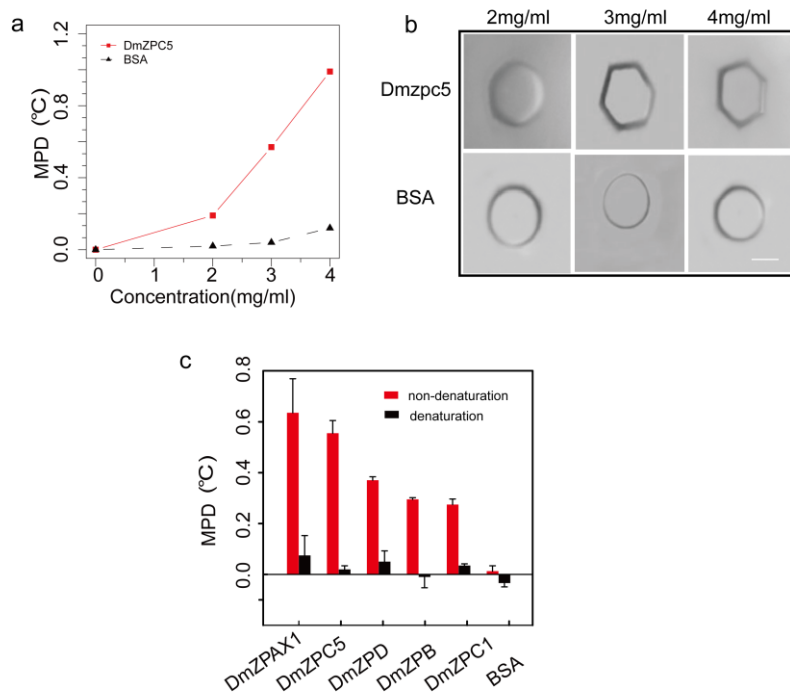

**Supplementary Figure 3. The non-colligative melting point depression induced by the recombinant AnnotoZPs. (a) The relationship between melting point depression and the concentration of ZPC5 and comparison with a control protein, BSA (bovine serum albumin).**

**(b). The morphology of the ice crystals that were grown at different protein concentrations.**

The freezing and melting point data were measured using a 1x TBS solution. **(c). The melting point depression (MPD) activity of AnnotoZPs was significantly reduced by alkaline-denaturation.** Each protein sample intended for the denaturing test was divided into two aliquots (2  $\mu$ l each). Equal volumes (2  $\mu$ l each) of either 0.4 M NaOH (dissolved in water) or 1x TBS was added to each aliquot. After incubating the solutions for 10 min at room temperature, the melting and freezing points of the treated (denatured with NaOH) and native (non-denatured in 1x TBS) samples were measured using a Nanoliter Osmometer. The protein concentrations were 3 mg/ml in each sample. Melting point depression was greatly reduced in the AnnotoZP samples, while no change was observed (both were close to 0) for BSA.

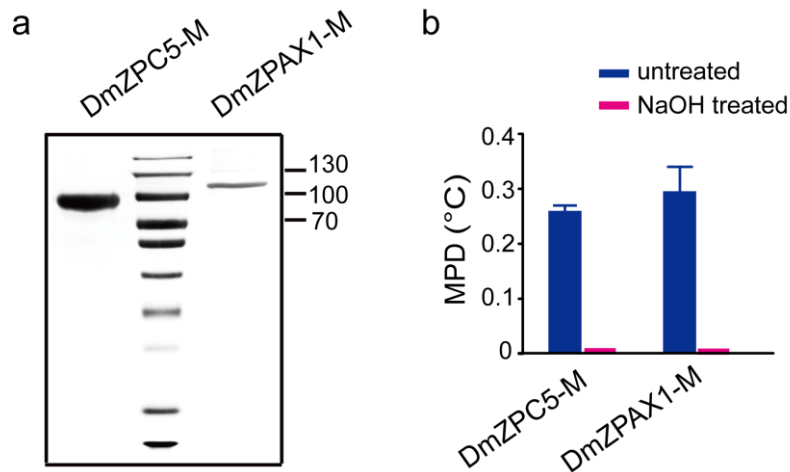

**Supplementary Figure 4. MPD activity assay for secreted DmZPC5 and DmZPAX1.** (a). PAGE analysis of secreted DmZPC5 and DmZPAX1 (labeled as DmZPC5-M, DmZPAX1-M respectively) purified from the culture media of CHO cells expressing the ZP proteins. The proteins were visualized by silver staining. (b) MPD activities measured from the two secreted proteins in the native and NaOH-treated samples.

flag

|                         |                       |          |                     |              |
|-------------------------|-----------------------|----------|---------------------|--------------|
| DmZPC5 <sup>ΔA1</sup>   | MEAFNFQVILLVGLCVSSSFA | DYKDDDDK | FPPTRYTQDASFQSLANTS | RSEIVQQQQQQK |
| DmZPC5 <sup>ΔA/B</sup>  | MEAFNFQVILLVGLCVSSSFA | DYKDDDDK | FPPTRYTQDASFQSLANTS | RSEIVQQQQQQK |
| DmZPC5 <sup>ΔA2/B</sup> | MEAFNFQVILLVGLCVSSSFA | DYKDDDDK | FPPTRYTQDASFQSLANTS | RSEIVQQQQQQK |
| DmZPC5                  | MEAFNFQVILLVGLCVSSSFA | DYKDDDDK | FPPTRYTQDASFQSLANTS | RSEIVQQQQQQK |

\*\*\*\*\*

|                         |                |                        |                          |
|-------------------------|----------------|------------------------|--------------------------|
| DmZPC5 <sup>ΔA1</sup>   | SKAEEPQQVNTIRV | TCHPDSLEIVIKANMFAVGAPV | NANEIRLGVETNNQYCRATASSAD |
| DmZPC5 <sup>ΔA/B</sup>  | SKAEEPQQVNTIRV | TCHPDSLEIVIKANMFAVGAPV | NANEIRLGVETNNQYCRATASSAD |
| DmZPC5 <sup>ΔA2/B</sup> | SKAEEPQQVNTIRV | TCHPDSLEIVIKADMFAVGAPV | DADEIRLGVETNNQYCRATASSAD |
| DmZPC5                  | SKAEEPQQVNTIRV | TCHPDSLEIVIKADMFAVGAPV | DADEIRLGVETNNQYCRATASSAD |

\*\*\*\*\*

|                         |                                   |            |                    |
|-------------------------|-----------------------------------|------------|--------------------|
| DmZPC5 <sup>ΔA1</sup>   | EYSISVGLVECGTRHWVTEDSLIYTNLLIYSPQ | ASPYGVVRM  | QAVIPIECHYERKYSVS  |
| DmZPC5 <sup>ΔA/B</sup>  | EYSISVGLVECGTRHWVTEDSLIYTNLLIYSPQ | ASPYGVVRM  | QAVIPIECHYERKYSVS  |
| DmZPC5 <sup>ΔA2/B</sup> | EYSISVGLVECGTRHWVTEDSLIYTNLLIYSP  | EASPYGVVRM | DEAVIPIECHYERKYSVS |
| DmZPC5                  | EYSISVGLVECGTRHWVTEDSLIYTNLLIYSP  | EASPYGVVRM | DEAVIPIECHYERKYSVS |

\*\*\*\*\*

zp domain

|                         |                                                              |
|-------------------------|--------------------------------------------------------------|
| DmZPC5 <sup>ΔA1</sup>   | SSSLMPTWIPFMSTQAAVEMLQFNLRIMTSDWQYKRSSNVFHLGEPISIEASVRIGHHMG |
| DmZPC5 <sup>ΔA/B</sup>  | SSSLMPTWIPFMSTQAAVEMLQFNLRIMTSDWQYKRSSNVFHLGEPISIEASVRIGHHMG |
| DmZPC5 <sup>ΔA2/B</sup> | SSSLMPTWIPFMSTQAAVEMLQFNLRIMTSDWQYKRSSNVFHLGEPISIEASVRIGHHMG |
| DmZPC5                  | SSSLMPTWIPFMSTQAAVEMLQFNLRIMTSDWQYKRSSNVFHLGEPISIEASVRIGHHMG |

\*\*\*\*\*

|                         |                                                              |
|-------------------------|--------------------------------------------------------------|
| DmZPC5 <sup>ΔA1</sup>   | LRVFNSSCVATLSPDMNSSPRHAFIENGCFVDSQLPGSRSQFLARTQDDKLHMSIDAFRF |
| DmZPC5 <sup>ΔA/B</sup>  | LRVFNSSCVATLSPDMNSSPRHAFIENGCFVDSQLPGSRSQFLARTQNNKLHMSIDAFRF |
| DmZPC5 <sup>ΔA2/B</sup> | LRVFNSSCVATLSPDMNSSPRHAFIENGCFVDSQLPGSRSQFLARTQNNKLHMSIDAFRF |
| DmZPC5                  | LRVFNSSCVATLSPDMNSSPRHAFIENGCFVDSQLPGSRSQFLARTQDDKLHMSIDAFRF |

\*\*\*\*\*

|                         |                                  |       |                 |                    |
|-------------------------|----------------------------------|-------|-----------------|--------------------|
| DmZPC5 <sup>ΔA1</sup>   | YNEDRGELYITCHLNAEPINDADATNKACTFV | NGRWR | SADGNDYLCGQCKRS | IEVEQTPS           |
| DmZPC5 <sup>ΔA/B</sup>  | YNQNRGQLYITCHLNAQPINNANATNKACTFV | NGRWR | SANGN           | NYLCGQCKRSIQVEQTPS |
| DmZPC5 <sup>ΔA2/B</sup> | YNQNRGQLYITCHLNAQPINNANATNKACTFV | NGRWR | SANGN           | NYLCGQCKRSIQVEQTPS |
| DmZPC5                  | YNEDRGELYITCHLNAEPINDADATNKACTFV | NGRWR | SADGNDYLCGQCKRS | IEVEQTPS           |

\*, \*, \*\*\*\*\* , \*\* \* \*\*\*\*\* \*\*\*\*\* \* \*\*\*\*\* , \*\*\*\*\*

|                         |                                                            |
|-------------------------|------------------------------------------------------------|
| DmZPC5 <sup>ΔA1</sup>   | KPSSPSKFRPRGFVKPEEREPLWRSGLKTSVWEHQARVGPLMVLPAKQKSRIPAKQRS |
| DmZPC5 <sup>ΔA/B</sup>  | KPSSPSKFRPRGFVKPEEREPLWRSGLKTSVWEHQARVGPLMVLPAKQKSRIPAKQRS |
| DmZPC5 <sup>ΔA2/B</sup> | KPSSPSKFRPRGFVKPEEREPLWRSGLKTSVWEHQARVGPLMVLPAKQKSRIPAKQRS |
| DmZPC5                  | KPSSPSKFRPRGFVKPEEREPLWRSGLKTSVWEHQARVGPLMVLPAKQKSRIPAKQRS |

\*\*\*\*\*

|                         |                                                              |
|-------------------------|--------------------------------------------------------------|
| DmZPC5 <sup>ΔA1</sup>   | SILDQISRSTMYGSQWRSGINRVDQRKGLLPDSSSTQNQVAVLTLASEQNQDGEDKSGTE |
| DmZPC5 <sup>ΔA/B</sup>  | SILDQISRSTMYGSQWRSGINRVDQRKGLLPDSSSTQNQVAVLTLASEQNQDGEDKSGTE |
| DmZPC5 <sup>ΔA2/B</sup> | SILDQISRSTMYGSQWRSGINRVDQRKGLLPDSSSTQNQVAVLTLASEQNQDGEDKSGTE |
| DmZPC5                  | SILDQISRSTMYGSQWRSGINRVDQRKGLLPDSSSTQNQVAVLTLASEQNQDGEDKSGTE |
|                         | *****                                                        |
| DmZPC5 <sup>ΔA1</sup>   | KDEDAEEVHELLEKTSPEAHLQSKAAVLNGTDTAALDEVFPTAAVNVAVPPLSNTTATVS |
| DmZPC5 <sup>ΔA/B</sup>  | KDEDAEEVHELLEKTSPEAHLQSKAAVLNGTDTAALDEVFPTAAVNVAVPPLSNTTATVS |
| DmZPC5 <sup>ΔA2/B</sup> | KDEDAEEVHELLEKTSPEAHLQSKAAVLNGTDTAALDEVFPTAAVNVAVPPLSNTTATVS |
| DmZPC5                  | KDEDAEEVHELLEKTSPEAHLQSKAAVLNGTDTAALDEVFPTAAVNVAVPPLSNTTATVS |
|                         | *****                                                        |
| DmZPC5 <sup>ΔA1</sup>   | DLSETMDPKRK                                                  |
| DmZPC5 <sup>ΔA/B</sup>  | DLSETMDPKRK                                                  |
| DmZPC5 <sup>ΔA2/B</sup> | DLSETMDPKRK                                                  |
| DmZPC5                  | DLSETMDPKRK                                                  |
|                         | *****                                                        |

**Supplementary Figure 5. Amino acid alignment of DmZPC5 and site-mutated variants showing the identity of the amino acids that comprise the acidic patches on the surface of native DmZPC5 and the detailed amino acid substitutions in the site-mutated DmZPC5s (DmZPC5<sup>ΔA1</sup>, DmZPC5<sup>ΔA2/B</sup> and DmZPC5<sup>ΔA/B</sup>). The amino acids located within the ZP domains were boxed in a red rectangle. The Glutamine (Q) and Asparagine (N) that are used to replace the negatively charged amino acids - Glutamic acid (E) and aspartic acid (D), which constitute the predicted acid patches were shown in color shadows.**

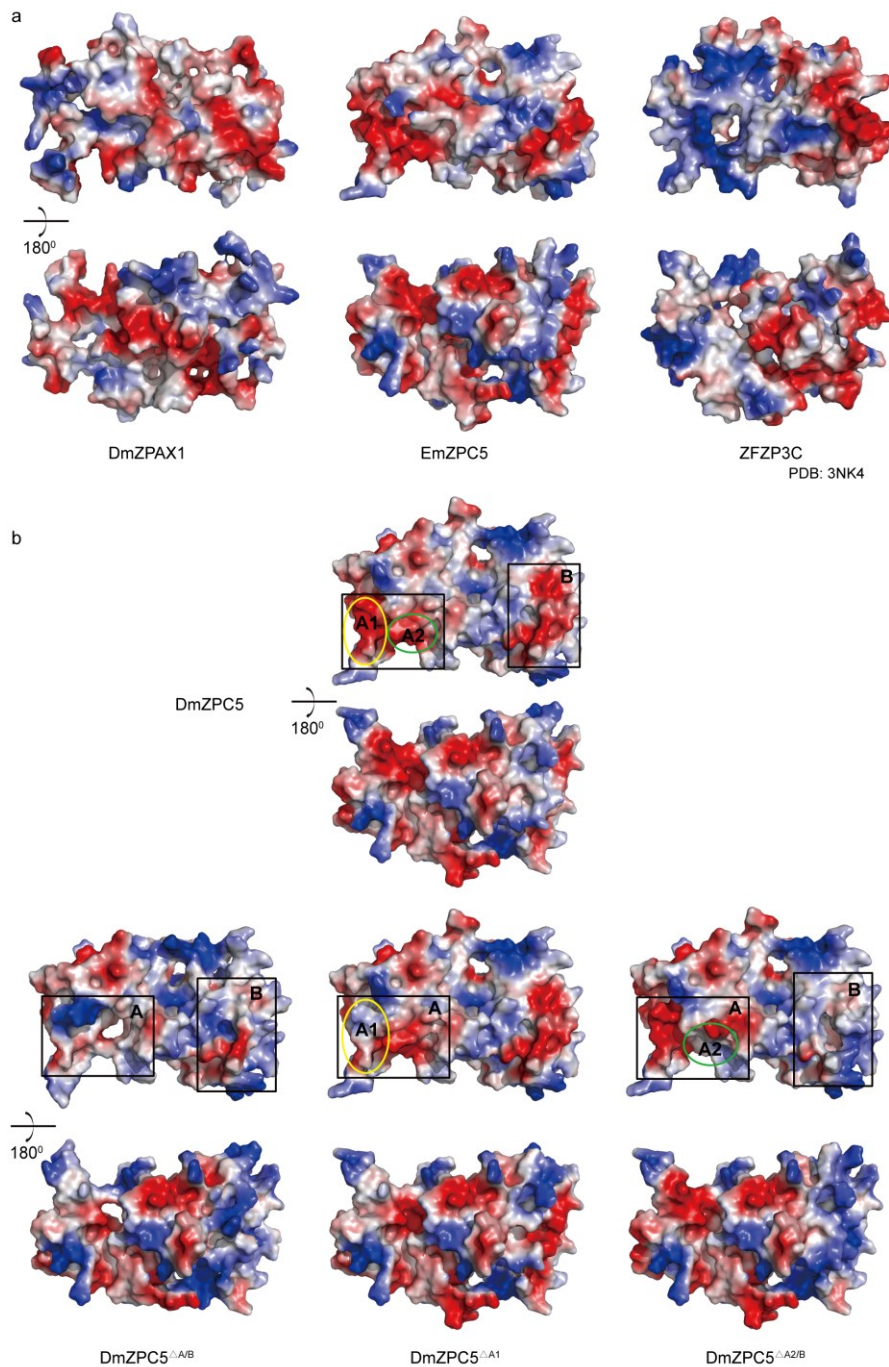

**Supplementary Figure 6. The distribution of acidic amino acid patches on the surfaces of native and site-mutated ZP proteins was revealed by structure modeling analyses. (a) The electrostatic surface potentials of DmZPAX1, EmZPC5 and ZFZP3C were compared. Larger areas of acidic patches (shown in red) were observed in DmZPAX1 and EmZPC5 than in ZFZP3C. (b) Schematic 3-D models showing the distribution of basic and acidic regions on the surfaces of the three site-directed mutants of DmZPC5 (DmZPC5 $\Delta^{A/B}$ , DmZPC5 $\Delta^{A1/B}$ , and DmZPC5 $\Delta^{A2/B}$ ). The**

areas were smaller than those in native DmZPC5. The acidic-A and -B regions are marked in rectangular boxes. The subareas corresponding to the acidic-A region are marked with oval circles. Blue indicates basic (positively charged) regions, and red indicates acidic (negatively charge) regions. Color intensity reflects the charge intensity.

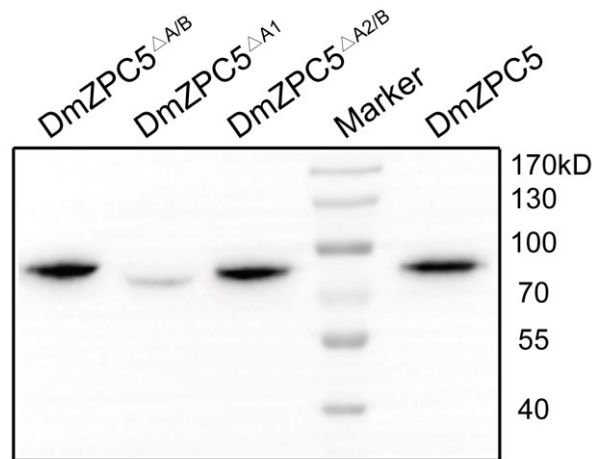

**Supplementary Figure 7. The full-size Western blot picture supplement to Fig. 6e showing the sizes of the recombinantly expressed mutant and native DmZPC5s isolate from CHO cell lysates. The gel was run in SDS-PAGE under reducing conditions.**



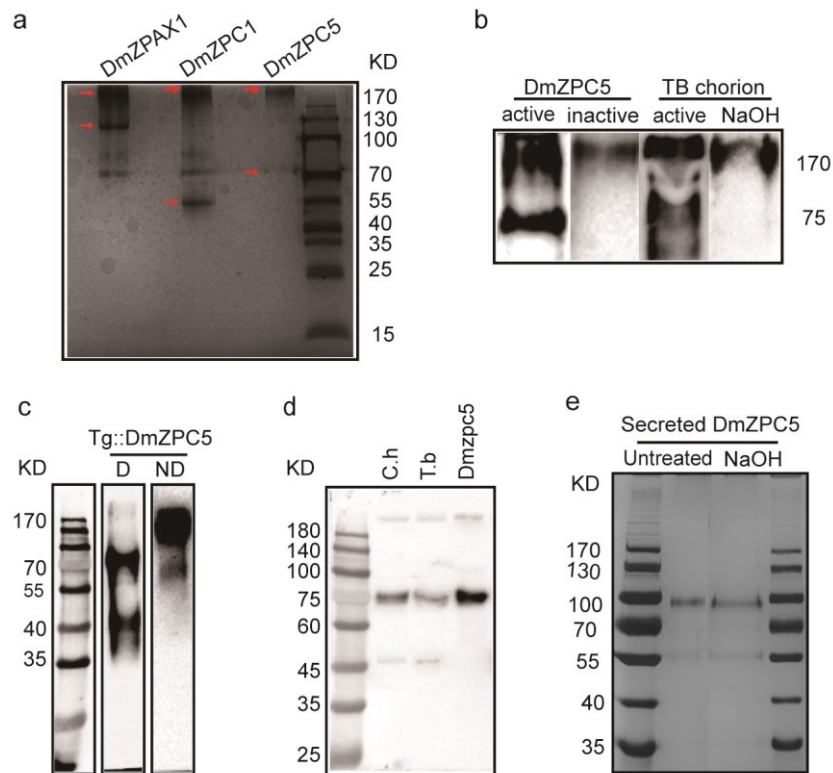

**Supplementary Figure 8. A non-denaturing gel was used to analyze the polymerization status of the ice melting-promoting (IMP) activity in the AnnotoZP samples. The results indicate a correlation between IMP activity and the unpolymerized conformation of the protein. (a).** Approximately 15  $\mu$ g of the purified recombinant protein (DmZPAX1, DmZPC1, DmZPC5) was used. Each showed IMP activity, and each was loaded onto a non-denaturing PAGE gel and visualized using silver staining. By using an electrophoretic condition without adding denaturing agents to the gel or the loading buffer, the proteins were maintained in their native conformations. The presence of a band with the predicted molecular weight in addition to a larger band in each sample lane (indicated by red arrows) suggested the presence of monomers and polymers in each sample. **(b). Purified recombinant DmZPC5 and *T. bernacchii* (TB) chorion extracts with and without IMP activity demonstrated different conformational states.** The recombinant DmZPC5 sample containing IMP activity contained both polymers (>170 kD) and monomers (75 kD), while the inactive sample contained only the polymers. This was also true for the *T. bernacchii* chorion proteins, in which the active sample was found to contain two conformations, while the sample treated with NaOH that lost IMP activity showed only the polymers and not the monomers. **(c).** The chorion proteins that were extracted from the DmZPC5 transgenic zebrafish

that has been found to have IMP activity possess non-cleaved (unpolymerized) DmZPC5 (the 75 kD band) under denaturing gel conditions (lane D), and both polymers and monomers when analyzed on a non-denaturing gel (lane ND). **(d). Western blot with anti-DmZPC5 antibody on a denaturing SDS-PAGE gel to show that the treatment of ZPC5 with 0.2M NaOH (final concentration) did not result in hydrolyzation of the ZP proteins. The denaturing gel electrophoresis and Western blotting were performed with the same protocol as other denaturing SDS-PAGE analysis. Lanes C. h and T. b is the total chorion proteins extracted from the eggs of *C. hamatus* and *T. bernacchii*, while DmZPC5 is the purified recombinant protein. In all three cases, NaOH treated samples contained the intact full-length 75 kD DmZPC5. The 45 kD bands appeared in the C. h and T. b lanes are the ZP products naturally present in the egg chorion resulted from the cleavage of the precursor protein at the furin cleavage site evidenced by the presence of the same 45KD band in the same samples without NaOH treatment shown in Supplementary Fig. 2b. The ChZPC5, TbZPC5 are highly similar to DmZPC5 in protein sequence, and thus can be detected by the DmZPC5 antibody. (e). Denaturing SDS-PAGE gel analysis of the secreted DmZPC5 after treating with 0.2M NaOH.** About 2 mg ml<sup>-1</sup> of DmZPC5 purified from the transfected CHO culture medium was treated with 0.2M NaOH for 30 minutes (the 'NaOH' lane) and loaded on a denaturing SDS-PAGE, with the same amount of untreated secreted dmZPC5 (the 'untreated' lane) as control. Silver staining was used to visualize the protein. Again, no significant level of degraded protein was seen in the NaOH treated sample.

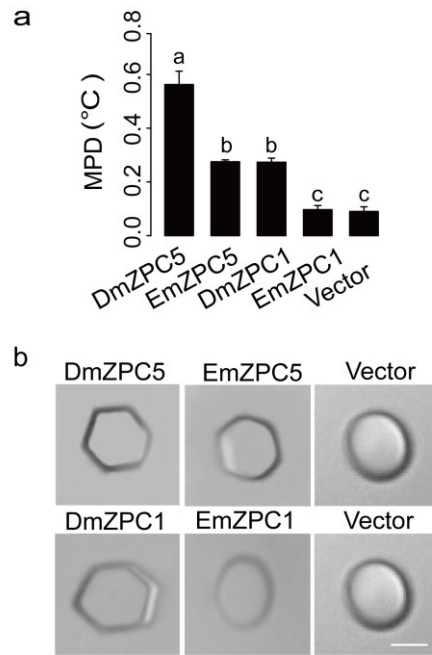

**Supplementary Figure 9. (a).** Enhanced melting point depression was observed in the recombinant ZPC1 and ZPC5 of the Antarctic notothenioid species *D. mawsoni* (DmZPC1, DmZPC5) compared to the MPDs of the orthologs of the basal temperate notothenioid species *E. maclovinus* (EmZPC1, EmZPC5). **(b).** Analysis of ice morphology revealed that a sharper hexagonal surface was associated with the DmZP protein samples. All of the proteins were assessed at a concentration of 3 mg ml<sup>-1</sup>. Scale bar, 25 μm.

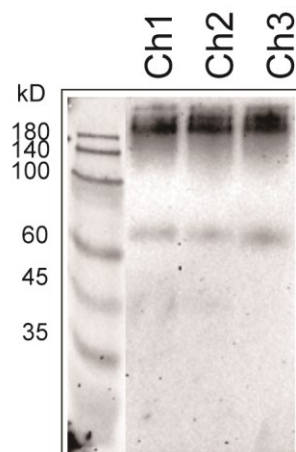

**Supplementary Figure 10. Western blotting analysis of serum total proteins of *C. hamatus* on**

**a non-denaturing PAGE gel showing presence of ZPC5 monomers *in vivo*.** The anti-DmZPC5 antibody was used for detection of homologous proteins. The concentration of total ZPC5 (including monomers and polymers) in the serum was estimated to be 2 mg ml<sup>-1</sup>. Ch1, Ch2, and Ch3 represent three individuals of *C. hamatus*: Ch2 is a male, and the other two are female judged from their developed gonads.

Supplementary Table 1

GenBank accession number

| Gene  | Species          |                    |                                              |                                  |                      |                    |                      |                    |                      |                  |
|-------|------------------|--------------------|----------------------------------------------|----------------------------------|----------------------|--------------------|----------------------|--------------------|----------------------|------------------|
|       | <i>D.mawsoni</i> | <i>N.coriiceps</i> | <i>C.hamatus</i>                             | <i>G.acuticeps</i>               | <i>T.bernacchii</i>  | <i>N.angustata</i> | <i>D.eleginoides</i> | <i>L.nudifrons</i> | <i>E.maclovinus</i>  | <i>O.latipes</i> |
| ZPAX1 | KM225616         | KU517856           | KU517856                                     | KU499996<br>KU522422<br>KU522423 | KU306106             |                    | KU500004             | KU530185           | KU306105             | AF128807         |
| ZPAX2 | KU306107         | KU499993           | KU517857<br>KU517858<br>KU517859<br>KU517860 | KU530176                         | KU306109             |                    |                      | KU530184           | KU306108             |                  |
| ZPC1  | KM030015         | KU512752           | KM076760<br>KU517863<br>KU517864<br>KU517865 | KM076762<br>KU499997<br>KU530175 | KM030017<br>KU306084 | KU512751           | KU512745             | KU530178           | KM030016<br>KU306083 | AF128809         |
| ZPC2  | KM225617         | KU500005           | KU517866<br>KU517867                         | KU499999<br>KU530174             | KU306086             |                    | KU500003             | KU530179           | KU306085             | AF128810         |
| ZPC3  | KU306087         | KU499995           |                                              | KU500001<br>KU522425             | KU306089<br>KU306090 |                    |                      | KU530180           | KU306088             | AF128811         |
| ZPC4  | KU306091         |                    | KU517868<br>KU517869                         | KU499998<br>KU522426             | KU306093             |                    |                      | KU530181           | KU306092             | AF128812         |

---

|      |          |          |          |          |          |          |          |          |          |          |
|------|----------|----------|----------|----------|----------|----------|----------|----------|----------|----------|
|      | KM030018 |          |          |          |          |          |          |          |          |          |
|      | KU306094 |          |          |          |          |          |          |          |          |          |
|      | KU306095 | KU512753 | KM076761 | KM076763 |          |          | KU512746 |          |          |          |
| ZPC5 | KU306096 | KU512754 | KU517870 | KU500002 | KM030020 |          | KU512747 |          | KM030019 |          |
|      | KU306097 | KU512755 | KU517871 | KU522427 | KU306103 | KU500006 | KU512748 | KU530177 | KU306101 | AF128813 |
|      | KU306098 | KU512756 | KU517872 | KU522428 |          |          | KU512749 |          | KU306102 |          |
|      | KU306099 |          |          |          |          |          | KU512750 |          |          |          |
|      | KU306100 |          |          |          |          |          |          |          |          |          |
| ZPB  | KU306080 | KU499994 | KU517862 | KU500000 | KU306082 |          |          | KU530183 | KU306081 | AF128808 |
|      |          |          |          | KU522424 |          |          |          |          |          |          |
| ZPD  | KM225618 |          | KU517873 | KU522429 | KU306104 |          |          | KU530182 |          |          |
| CGL  | KU306079 |          |          |          |          |          |          |          |          | AB025967 |
| CGH  | KU306078 |          |          |          |          |          |          |          |          | D89609   |

---

RNA seq data

SRP068525 transcriptomes data from *T. bernacchii* liver, brain and ovary tissues

GSE70113 transcriptome data from *G. acuticeps*, *T. bernacchii*, *C. hamatus* head kindey

**Supplementary Table 2. Copy number of each ZP type per haploid genome deduced from real-time PCR.**

| Species               | Gene copy numbers per haploid genome (mean±SD) |            |            |            |            |              |              | Total  |
|-----------------------|------------------------------------------------|------------|------------|------------|------------|--------------|--------------|--------|
|                       | ZPC1                                           | ZPC2       | ZPC3       | ZPC5       | ZPAX1      | ZPAX2        | ZPB          |        |
| <i>D.mawsoni</i>      | 8.84±0.64                                      | 12.76±0.17 | 3.52±0.16  | 15.04±0.55 | 7.32±0.76  | 6.94±0.16    | 5.71±0.21    | 60.13  |
| <i>N.coriiceps</i>    | 5.14±0.08                                      | 23.24±0.81 | 3.12±0.08  | 25.31±0.99 | 19.98±1.56 | 23.60±1.83   | 6.53±0.59    | 106.92 |
| <i>C.hamatus</i>      | 6.05±0.06                                      | 2.63±0.02  | 12.17±0.15 | 4.96±0.66  | 20.55±0.51 | 5.36±0.11    | 8.26±0.36    | 59.98  |
| <i>G.acuticeps</i>    | 3.92±0.05                                      | 7.28±0.04  | 10.62±0.04 | 17.64±0.06 | 37.11±0.53 | Not detected | 0.59±0.02    | 77.16  |
| <i>T.bernacchii</i>   | 3.84±0.53                                      | 23.93±2.83 | 31.98±0.71 | 34.52±1.28 | 9.70±1.13  | 3.34±0.38    | 0.35±0.02    | 65.97  |
| <i>N.angustata</i>    | 1.45±0.11                                      | 12.62±0.59 | 3.19±0.09  | 9.96±0.06  | 3.60±0.46  | 6.40±0.93    | 3.30±0.37    | 40.52  |
| <i>D.eleginoides</i>  | 5.73±0.16                                      | 9.38±0.31  | 3.69±0.12  | 11.25±0.17 | 6.94±0.22  | 7.32±0.16    | 5.72±0.33    | 50.03  |
| <i>L.nudifrons</i>    | 2.35±0.25                                      | 6.45±0.09  | 6.37±0.22  | 3.26±0.16  | 1.76±0.13  | Not detected | Not detected | 20.19  |
| <i>E.maclovinus</i>   | 1.05±0.05                                      | 1.18±0.12  | 0.86±0.02  | 1.39±0.06  | 1.36±0.08  | 1.16±0.12    | 1.10±0.05    | 8.1    |
| <i>*B. variegatus</i> | 0.84                                           | 0.36       | 1.57       | 0.96       | 1.24       | 0.82         | 0.97         | 6.76   |
| <i>**O.latipes</i>    | 1                                              | 1          | 1          | 1          | 1          | 1            | 1 (10)       | 6      |

\*The ZP copy number of *B. Variegatus* was estimated from the gene ratios derived from the aCGH results in Chen Z. et al 2008

\*\* The ZP copy number of *O.latipes* was derived from the reference of Kanamori A . et al 2003

The colors represent the different thermal environments of the fishes, same as in Fig. 2a

**Supplementary Table 3. The geographic localities of the *Notothenioids* sampled in this study.**

| <b>Species</b>                  | <b>Family</b>   | <b>Locality (latitude, longitude)</b>            |
|---------------------------------|-----------------|--------------------------------------------------|
| <i>Dissostichus mawsoni</i>     | Nototheniidae   | McMurdo Sound, Ross Sea (77°51'S, 166°40'E)      |
| <i>Notothenia coriiceps</i>     | Nototheniidae   | Palmer Archipelago (64°51'S, 63°34'W)            |
| <i>Chionodraco hamatus</i>      | Channichthyidae | Davis Station, Antarctica (68°35'S, 77°58'E)     |
| <i>Gymnodraco acuticeps</i>     | Bathydraconidae | Zhongshan Station, Antarctica (69°22'S, 76°22'E) |
| <i>Trematomus bernacchii</i>    | Nototheniidae   | Zhongshan Station , Antarctica(69°22'S, 76°22'E) |
| <i>Notothenia angustata</i>     | Nototheniidae   | Otago Harbor, New Zealand (45°30'S, 170°E)       |
| <i>Dissostichus eleginoides</i> | Nototheniidae   | Falkland Islands (51°25'S, 57°35'W)              |
| <i>Lepidonotothen nudifrons</i> | Nototheniidae   | Ushuaia Argentina (54°47'S, 68°20'W)             |
| <i>Eleginops maclovinus</i>     | Eleginopidae    | Falkland Islands (51°25'S, 57°35'W)              |



**Supplementary Table 4: Primers used in this study**

| Primer name                                                                | Primer sequence(5'-3')         | Purpose                                                        |
|----------------------------------------------------------------------------|--------------------------------|----------------------------------------------------------------|
| <b>I . Primers for amplification of the ZP genes from the genomic DNA.</b> |                                |                                                                |
| ZPC1-F                                                                     | ATGATGGTTTCATTTTGTCAAGGTG      | Amplify the full length gene of ZPC1                           |
| ZPC1-R                                                                     | TCAGGAATTCACATCTGTGATGGT       |                                                                |
| ZPAX1-ZPF                                                                  | CCACCCAATGGCACAAATGA           | Amplify the ZP domain region of ZPAX1 genes                    |
| ZPAX1-ZPR                                                                  | ATGCACACACTGGCCTCTGC           |                                                                |
| ZPC2-ZPF                                                                   | AACTGTGAAAAAGACTCCATAAGC       | Amplify the ZP domain region of ZPC2 genes                     |
| ZPC2-ZPR                                                                   | CATAGTGGCAAGCTTTCTTG           |                                                                |
| ZPC5-NF                                                                    | ATGGAGGCCTTTAATTTTCA           | Amplify the Exon1 of ZPC5 genes                                |
| ZPC5-NR                                                                    | GACACTGGGTAAGTGGAGGAC          |                                                                |
| ZPC5-CF                                                                    | ATGCCTTCAGATTTTATAATGAGGACAGAG | Amplify the C-terminus of ZPC5 genes                           |
| ZPC5-CR                                                                    | CCATTGTTTCAGAAAGGTCAGATACTGTT  |                                                                |
| ZPC5-ZPF                                                                   | GCAGGTGAATACCATCAGAG           | Amplify the ZP domain region of ZPC5 genes                     |
| ZPC5-ZPR                                                                   | AGGTCTGCTGATGGTAATGA           |                                                                |
| ZPC3-F                                                                     | TTGGAGCCACAGTCTTGTAG           | Amplify portion of the ZP domain region of ZPC3 genes          |
| ZPC3-R                                                                     | GGAAGGGAATATAAACTGC            |                                                                |
| ZPC4-F                                                                     | CGACAAAAGAGAAGATTATC           | Amplify portion of the ZP domain region of ZPC4 genes          |
| ZPC4-R                                                                     | TGCTCGATAAAGTCATATCT           |                                                                |
| ZPB-F                                                                      | TTGGACCCAGAGGATCGATC           | Amplify portion of the ZP domain region of ZPB genes           |
| ZPB-R                                                                      | ACCCATCAACCAGGAGGTCC           |                                                                |
| ZPAX2-F                                                                    | GAGTGTTCCTAATGGGACC            | Amplify portion of the ZP domain region of ZPAX2 genes         |
| ZPAX2-R                                                                    | TACGGTTCACCTCCTGCGAGG          |                                                                |
| EmZPC3/SP                                                                  | ACATTAAGATTTGACACAGAACGTC      | Amplify portion of ZPC3 gene from <i>E. maclovivus</i> genomic |
| EmZPC3/ASP                                                                 | CTGGTCGTGCCACAGGAGTT           | DNA                                                            |

---

|             |                      |                                                                     |
|-------------|----------------------|---------------------------------------------------------------------|
| TbZPAX1-SP  | ATCCATCCTACGAGCTCTTC | Amplify portion of ZPAX1 gene from <i>T. bernacchii</i> genomic DNA |
| TbZPAX1-ASP | CATAAAGGGTTGCCAACAG  |                                                                     |
| TBZPC2-SP   | AAAAAATAACAGGGGTAGCG | Amplify portion of ZPC2 gene from <i>T. bernacchii</i> genomic DNA  |
| TBZPC2-ASP  | CACATTGCTGTTAGCCTGCA |                                                                     |

**II .Primers for 3'-RACE and 5'-RACE of Em ZPC1 and ZPC5 genes.**

|              |                         |                                    |
|--------------|-------------------------|------------------------------------|
| EmZPC5-GSP1  | ATCACATGGGGCTCCGAGTGTT  | Amplify the 3' end of Em ZPC5 gene |
| EmZPC5-GSP2  | GACTCTCAGCTTCCAGGCTCAA  |                                    |
| EmZPC1-GSP1  | ATGCAGACATGAAAGTGGACTG  | Amplify the 5' end of Em ZPC1 gene |
| EmZPC1-GSP2  | AGACCCATCAGCCCTTGCTGCT  |                                    |
| EmZPC1-GSP3  | ACTGCAAACCTTTTGGCTTGGGA |                                    |
| EmZPC1-GSPR1 | ATCCCAAGCCAAAAGTTTGCAG  | Amplify the 3' end of Em ZPC1 gene |
| EmZPC1-GSPR2 | TCAAGAAGCAGCAGCAAGGGCT  |                                    |

**III. Primers for quantification the ZP gene copy numbers in different fish species by real time quantitative PCR.**

|               |                          |                                                                                                                   |
|---------------|--------------------------|-------------------------------------------------------------------------------------------------------------------|
| ZPAX1-QF(cdn) | TCCTGCAGATCCATCCTACGA    | Amplify the ZPAX1 gene in <i>D. mawsoni</i> , <i>D. eleginoides</i> <i>N. coriiceps</i> , and <i>N. angustata</i> |
| ZPAX1-QR(dn)  | CAGAGGCTGCCGCAGATATT     |                                                                                                                   |
| ChZPAX1-QR    | AAAATACAGAGGCTGCTGCAGATA | Paired with ZPAX1-QF to amplify the ZPAX1 gene in <i>C.hamatus</i>                                                |
| EmZPAX1-QF    | CGGGACTCTTCTCCTGCAGAT    | Amplify the ZPAX1 gene in <i>E. maclovivus</i>                                                                    |
| EmZPAX1-QR    | GGCTGCCGCAGATATTTCA      |                                                                                                                   |
| ZPC1-QF(ce)   | CAGGCCCCGCTGAATCTAC      | Amplify the ZPC1 gene in <i>C.hamatus</i>                                                                         |
| ZPC1-QR(c)    | TCTGCACCACTAGCCATGAT     |                                                                                                                   |
| EmZPC1-QR     | TCTGGTCCCACTAGCCATGAT    | Paired with ZPC1-QF(ce) to amplify the ZPC1 gene in <i>E. maclovivus</i>                                          |
| NcZPC1-QF     | CAGGCCCTGCTGAATCTACAAG   | Amplify the ZPC1 gene in <i>N. coriiceps</i> and <i>N. angustata</i>                                              |

---

---

|             |                           |                                                                                                                   |
|-------------|---------------------------|-------------------------------------------------------------------------------------------------------------------|
| NcZPC1-QR   | TCTGCACCACACTAGCCATGA     |                                                                                                                   |
| DmZPC1-QF   | CAGGCCCTGCTGAATCTACAC     | Amplify the ZPC1 gene in <i>D. mawsoni</i> , <i>D. eleginoides</i> and <i>T. bernacchii</i>                       |
| DmZPC1-QR   | GCAAGGGCTGATGGGTCTT       |                                                                                                                   |
| ZPC2-QR(de) | CTCTCCGCTGGGCAGAAC        | Amplify the ZPC2 gene in <i>D. mawsoni</i> and <i>D. eleginoides</i>                                              |
| DmZPC2-QF   | CGGCAATATGCAGCTCGTTAC     |                                                                                                                   |
| EmZPC2-QF   | GCCATATGCAGCTCGTCTTTT     | Paired with ZPC2-QF(de) to amplify the ZPC1 gene in <i>E. maclovinus</i>                                          |
| ChZPC2-QF   | CGATGCTGGTGCCATTTG        | Amplify the ZPC2 gene in <i>C.hamatus</i>                                                                         |
| ChZPC2-QR   | CTCCGCTGGGCAGAACAT        |                                                                                                                   |
| NcZPC2-QF   | AGCAATATGCAGCTCGTCACTTC   | Amplify the ZPC2 gene in <i>N. coriiceps</i> and <i>N. angustata</i>                                              |
| NcZPC2-QR   | CCTCTCCCCTGGGCAGAA        |                                                                                                                   |
| ZPC5-QF(dc) | CCGCAGCAGGTGAATACCAT      | Amplify the ZPC5 gene in <i>T. bernacchii</i> , <i>D. mawsoni</i> and <i>D. eleginoides</i>                       |
| DmZPC5-QR   | GCAAACATGTCGGCTTTGATAAC   |                                                                                                                   |
| ChZPC5-QR   | GCGTATCTCGTCACCATCAACA    | Paired with ZPC5-QF(dc) to amplify the ZPC5 gene in <i>C.hamatus</i>                                              |
| EmZPC5-QF   | ACGACCGCAAGTGAATACCAT     | Amplify the ZPC5 gene in <i>E. maclovinus</i>                                                                     |
| EmZPC5-QR   | CGCAAACATGTCGGCTTTT       |                                                                                                                   |
| NcZPC5-QF   | TCATCCAGACTCTTTGGAGATTGTT | Amplify the ZPC5 gene in <i>N. coriiceps</i> and <i>N. angustata</i>                                              |
| NcZPC5-QR   | AGGCGTATCTCGTCACCATCA     |                                                                                                                   |
| ChZPAX2-QF  | GGTCCCACATACAGCAACGA      | Paired with ZPAX2-QR to amplify the ZPAX2 gene in <i>C.hamatus</i>                                                |
| ZPAX2-QF    | GCCCCACATACAGCAACGA       | Amplify the ZPAX2 gene in <i>N. coriiceps</i> , <i>N. angustata</i> , <i>D. mawsoni</i> and <i>D. eleginoides</i> |
| ZPAX2-QR    | CGTCCCACAGGAGTTTGCA       |                                                                                                                   |
| EmZPAX2-QF  | TGGTCCGACATACAGCAATGA     | Amplify the ZPAX2 gene in <i>E. maclovinus</i>                                                                    |
| EmZPAX2-QR  | CTGGTCGTGCCACAGGAGTT      |                                                                                                                   |
| EmZPC3-QF   | TGCACAGAAGCGTCCATGAT      | Amplify the ZPC3 gene in <i>E. maclovinus</i>                                                                     |

---

---

|            |                             |                                                                                                                                                              |
|------------|-----------------------------|--------------------------------------------------------------------------------------------------------------------------------------------------------------|
| EmZPC3-QR  | AAAGGCGTCCATTGTTGAAGA       |                                                                                                                                                              |
| EmZPC4-QF  | TTTCTGCCATCATGGGTAACC       | Amplify the ZPC4 gene in <i>E. maclovinus</i>                                                                                                                |
| EmZPC4-QR  | GCAACACAATGGTCCACATAGACT    |                                                                                                                                                              |
| ZPB-QF     | TGCTGAGGGAACCTGTCTATGTT     | Amplify the ZPB gene in <i>N. coriiceps</i> , <i>N. angustata</i> , <i>D. mawsoni</i> , <i>D. eleginoides</i> , <i>T. bernacchii</i> and <i>C.hamatus</i>    |
| ZPB-QR     | CAGGACGATGTTTGGGTCAGA       |                                                                                                                                                              |
| EmZPB-QF   | CCAGCAGACTACCCAGTCACTAAA    | Amplify the ZPB gene in <i>E. maclovivus</i>                                                                                                                 |
| EmZPB-QR   | CCAGGATGCTCACCTCAACAT       |                                                                                                                                                              |
| ZPC4-QF    | TTTTACGTTTCTGCCTTCATG       | Amplify the ZPC4 gene in <i>N. coriiceps</i> and <i>N. angustata</i> , <i>D. mawsoni</i> and <i>D. eleginoides</i> , <i>C.hamatus</i> , <i>T. bernacchii</i> |
| ZPC4-QR    | GCAACACAATGGTCCACATAGACT    |                                                                                                                                                              |
| DmZPC3-QF  | CCTTTTGTCTCCATGGGATTTTC     | Amplify the ZPC3 gene in <i>D. mawsoni</i>                                                                                                                   |
| DmZPC3-QR  | TCGACACTGACTGCTCTGTGAA      |                                                                                                                                                              |
| GaZPC1-QF  | TGCTGTACGGCAATGATCTGA       | Amplify the ZPC1 gene in <i>G. acuticeps</i>                                                                                                                 |
| GaZPC1-QR  | GGGTGAGTAAAGGCCAAATTGT      |                                                                                                                                                              |
| GaZPC2-QF  | CGCACTCGATGGGATACACA        | Amplify the ZPC2 gene in <i>G. acuticeps</i>                                                                                                                 |
| GaZPC2-QR  | GACTTTCAGGCCAGACCAA         |                                                                                                                                                              |
| GaZPC3-QF  | AACTGACTGCTCTGTGAATGCTT     | Amplify the ZPC3 gene in <i>G. acuticeps</i>                                                                                                                 |
| GaZPC3-QR  | GCCTTTTGTCTCCATGGGATT       |                                                                                                                                                              |
| GaZPC4-QF  | ATCCCCTCTCAAAGTCCAAT        | Amplify the ZPC4 gene in <i>G. acuticeps</i>                                                                                                                 |
| GaZPC4-QR  | ATGACTTGTTTACGTTTGGATTTCTCT |                                                                                                                                                              |
| GaZPC5-QF  | TGTTAGCTCCTCTTTTGCTTTCCT    | Amplify the ZPC5 gene in <i>G. acuticeps</i>                                                                                                                 |
| GaZPC5-QR  | CTGTGTTTCGCAAGGCTCTGA       |                                                                                                                                                              |
| GaZPAX1-QF | CACCCCAATGGCACAATGA         | Amplify the ZPAX1 gene in <i>G. acuticeps</i>                                                                                                                |
| GaZPAX1-QR | TGGCTTCAGATTACGAGTCGATT     |                                                                                                                                                              |
| GaZPB-QF   | CCTCCATGACGATAGCTTCCA       | Amplify the ZPB gene in <i>G. acuticeps</i>                                                                                                                  |
| GaZPB-QR   | TCCGCACAGTTATTGTTTCAG       |                                                                                                                                                              |
| LnZPAX1-QR | GACCACATAGAAGCAGGAAA        | Amplify the ZPAX1 gene in <i>L. nudifrons</i>                                                                                                                |

---

---

|            |                           |                                                |
|------------|---------------------------|------------------------------------------------|
| LnZPAX1-QR | AAAGGAGCAGCCAACACAT       |                                                |
| LnZPC1-QF  | GTTTCTCAGTTGTTTACCC       | Amplify the ZPC1 gene in <i>L. nudifrons</i>   |
| LnZPC1-QR  | CATTTTCTACACATTTTGCTT     |                                                |
| LnZPC2-QF  | GCATGAGCCCTCACCATTT       | Amplify the ZPC2 gene in <i>L. nudifrons</i>   |
| LN-ZPC2-QR | TCCTCCTTTCCTGAACCCG       |                                                |
| LnZPC3-QF  | GAGTCACCAGCAGCAACAG       | Amplify the ZPC3 gene in <i>L. nudifrons</i>   |
| LnZPC3-QR  | TCAGCGTACAATGCACAGA       |                                                |
| LnZPC5-QF  | GTGTTGTTCGAATGGAGGAGGCT   | Amplify the ZPC5 gene in <i>L. nudifrons</i>   |
| LnZPC5-QR  | GTTGACATGAAGGGGATCCAGGTAG |                                                |
| TbZPC2-QF  | CAATATGGGCAACAGTGGAG      | Amplify the ZPC2 gene in <i>T. bernacchii</i>  |
| TbZPC2-QR  | ACACATTCCTCCATGAGCAG      |                                                |
| TbZPAX1-QF | GGTGGAGCTGATGCATTCTA      | Amplify the ZPAX1 gene in <i>T. bernacchii</i> |
| TbZPAX1-QR | AGGGTTGCCCAACAGTTCT       |                                                |
| TbZPC3-QF  | TCACAGAGCAGTCAGTGTCCG     | Amplify the ZPC3 gene in <i>T. bernacchii</i>  |
| TbZPC3-QF  | GAGCCACAGTCTTGTAGTCCAG    |                                                |

#### IV. Primers for construction of the transgenic plasmids

|              |                                                   |                                          |
|--------------|---------------------------------------------------|------------------------------------------|
| Tol2-5'F     | CCATTAATCAGAGGTGTAAAGTACTTGAGTAATT                | Amplify the 5' end of Tol2 gene          |
| Tol2-5'R     | CACGCTAGCTAATAGCAAGGGAAAATAGAATGAAGT              |                                          |
| Tol2-3' F    | GACTTAAGCAGAGGTGTAAAAAGTACTCAAAAATTTTACTCAAGTGAAA | Amplify the 3' end of Tol2 gene          |
| Tol2-3' R    | GACTTAAGGCTTAAACAAGAATCTCTAGTTTTT                 |                                          |
| ZB-ZP3-pro F | GCACTCGAGTGGTATTATAGGAAGTAAACCA                   | Amplify the Zebrafish ZP3 promoter       |
| ZB-ZP3-pro R | ACGAATTCATTGCCTGCTGACTAATTAACC                    |                                          |
| DmZPC5-F     | CTTCGAATTCCTTCAGTTTCACTTATGGAG                    | Construction of DmZPC5 transgenic vector |
| DmZPC5-R     | TGGATCCCGGGAATAATTTATTTTCTCTTTGGGTC               |                                          |

---

---

**V. Primers for quantification of *D.mawsoni* mRNA by real time quantitative PCR.**

|               |                          |                                                  |
|---------------|--------------------------|--------------------------------------------------|
| ZPAX1-QF(cdn) | TCCTGCAGATCCATCCTACGA    | Amplify the ZPAX1 gene in <i>D. mawsoni</i>      |
| ZPAX1-QR(dn)  | CAGAGGCTGCCGCAGATATT     |                                                  |
| ZPB-QF        | TGCTGAGGGAACCTGTCTATGTT  | Amplify the ZPB gene in <i>D. mawsoni</i>        |
| ZPB-QR        | CAGGACGATGTTTGGGTCAGA    |                                                  |
| ZPAX2-QF      | GCCCCACATACAGCAACGA      | Amplify the ZPAX2 gene in <i>D. mawsoni</i>      |
| ZPAX2-QR      | CGTCCCACAGGAGTTTGCA      |                                                  |
| ZPC5-QF(dc)   | CCGCAGCAGGTGAATACCAT     | Amplify the ZPC5 gene in <i>D. mawsoni</i>       |
| Dm-ZPC5-QR    | GCAAACATGTCCGCTTTGATAAC  |                                                  |
| ZPC2-QR(de)   | CTCTCCGCTGGGCAGAAC       | Amplify the ZPC2 gene in <i>D. mawsoni</i>       |
| DmZPC2-QF     | CGGCAATATGCAGCTCGTTAC    |                                                  |
| ZPC4-QF       | TTTTCACGTTTCTGCCTTCATG   | Amplify the ZPC4 gene in <i>D. mawsoni</i>       |
| ZPC4-QR       | GCAACACAATGGTCCACATAGACT |                                                  |
| Bactin-QF     | ATTGTGACCAACTGGGATGA     | Amplify the beta-actin gene in <i>D. mawsoni</i> |
| Bactin-QR     | GGGCAACTCTCAGCTCGT       |                                                  |

**VI. Primers for construction of the expression plasmids**

|            |                                             |                                          |
|------------|---------------------------------------------|------------------------------------------|
| EmZPC1/SP  | TCAGATCTCGAGATTCAGTCAAATGGCTTCC             | Construction of EmZPC1 expression vector |
| EmZPC1/ASP | <u>CCCGGGCCGCGGAACCAAGAATAAAATCCCAATTCA</u> |                                          |
| DmZPC1/SP  | TCAGATCTCGAGGTCATGATGGTTTCATTTTG            | Construction of DmZPC1 expression vector |
| DmZPC1/ASP | <u>CCCGGGCCGCGGGAATAAAAACCAAATTCAGATTGA</u> |                                          |
| DmZPC2-F   | CTTCGAATTCATGGGGACTCAACTCTACCT              | Construction of DmZPC2 expression vector |
| DmZPC2-R   | ACGACGTCGACCAACTTTAATCTGCATATGG             |                                          |
| DmZPC5-F   | CTTCGAATTCCTTCAGTTTCACTTATGGAG              | Construction of DmZPC5 expression vector |
| DmZPC5-R   | TGGATCCCGGGAATAATTTATTTTCTCTTTGGGTC         |                                          |
| EmZPC5-SP  | CTTCGGAATTCATGGAGGCCTTTAATTTTCAGG           | Construction of EmZPC5 expression vector |

---

---

|                 |                                         |                                               |
|-----------------|-----------------------------------------|-----------------------------------------------|
| EmZPC5-ASP      | <u>CCCGGGTTATCTCTTTGGGTCCTTTG</u>       |                                               |
| DmZPAX1-F       | GACGAATTCGCTGCTAACAAACTGCAACATGCTGAG    | Construction of DmZPAX1 expression vector     |
| DmZPAX1-R       | GACTCTCCGCGGGTGCCAAACAAAACAATGAACAAA    |                                               |
| DmZPB-F         | GACGTCGACGACTTATACCATAATGGAGC           | Construction of DmZPB expression vector       |
| DmZPB-R         | GACTCTCCGCGGTTCCAGTGGCTTTTCATCTC        |                                               |
| Q5SDM_DmZPC1_F  | gatgatgataaaGACATGAAAGTGGACTGTGG        | Insert FLAG into the DmZPC1 expression vector |
| Q5SDM_DmZPC1_R  | atctttataatcTGCATATACCGCCATGGC          |                                               |
| Q5SDM_EmZPC1_F  | gatgatgataaaTGAAACTGGACTGTGGGC          | Insert FLAG into the EmZPC1 expression vector |
| Q5SDM_EmZPC1_R  | atctttataatcTCTGCAAATACCGCAATG          |                                               |
| Q5SDM_dmZPAX1_F | gatgatgataaaAGGTCTAATGTGAAGCTAAATTTG    | Insert FLAG into the DmZPAX1 expression       |
| Q5SDM_dmZPAX1_R | atctttataatcGGCTTGACCCAAGATGATAAC       | vector                                        |
| Q5SDM_dmZPC2_F  | gatgatgataaaGAAATCAAAGTAAACTGTGAAAAAGAC | Insert FLAG into the DmZPC2 expression vector |
| Q5SDM_dmZPC2_R  | atctttataatcTGCATTAGCAACCGTTGTTG        |                                               |
| Q5SDM_dmZPB_F   | gatgatgataaaCAGAATCCCTGGATGCAAC         | Insert FLAG into the DmZPB expression vector  |
| Q5SDM_dmZPB_R   | atctttataatcGGCAAACGCATCACAGGC          |                                               |
| Q5SDM_EmZPC5_F  | gatgatgataaaTTCCCGCCCACACGGTAC          | Insert FLAG into the EmZPC5 expression vector |
| Q5SDM_EmZPC5_R  | atctttataatcAGCGAAAGAGGAGCTAACACAG      |                                               |
| Q5SDM_dmZPC5_F  | gatgatgataaaTTCCCGCCCACACGCTAC          | Insert FLAG into the DmZPC5 expression vector |
| Q5SDM_dmZPC5_R  | atctttataatcAGCAAAGAGGAGCTAACACAGAG     |                                               |

---

### Supplementary References

1. Chen Z, *et al.* Transcriptomic and genomic evolution under constant cold in Antarctic notothenioid fish. *Proceedings of the National Academy of Sciences of the United States of America* **105**, 12944-12949 (2008).
2. Kanamori A, Naruse K, Mitani H, Shima A, Hori H. Genomic organization of ZP domain containing egg envelope genes in medaka (*Oryzias latipes*). *Gene* **305**, 35-45 (2003).
